# Supplementary material for: Dynamics of Microbial Communities in Phototrophic Polyhydroxyalkanoate Accumulating Cultures
Source: MDPI journal article supplement (doi:10.3390/microorganisms10020351), 2022-02-03
Supplement: s1 [file s1]

# Supplementary Material

**Table S1.** DNA sequencing results of the phototrophic mixed cultures operated with synthetic acetate.

|                                                                 | S1    | S2    | S3    | S4    | S5    |
|-----------------------------------------------------------------|-------|-------|-------|-------|-------|
|                                                                 | %     |       |       |       |       |
| <i>p_Acidobacteria/c_Chloracidobacteria</i>                     | 0.00  | 0.04  | 0.00  | 0.00  | 0.00  |
| <i>p_Actinobacteria</i>                                         | 0.00  | 2.10  | 0.00  | 0.06  | 1.80  |
| <i>o_Actinomycetales</i>                                        | 0.00  | 2.10  | 0.00  | 0.06  | 1.80  |
| <i>p_Bacteroidetes</i>                                          | 5.80  | 0.08  | 0.20  | 0.14  | 7.36  |
| <i>c_Bacteroidia/o_Bacteroidales</i>                            | 3.60  | 0.00  | 0.10  | 0.06  | 7.08  |
| <i>c_Shingobacteriia/o_Saprospirales/f_Saprospiraceae</i>       | 0.00  | 0.06  | 0.00  | 0.00  | 0.00  |
| <i>c_Cytophagales/ f_WCHB1-69_OTU_43;17;</i>                    | 2.20  | 0.00  | 0.10  | 0.00  | 0.00  |
| <i>p_Chlorobi</i>                                               | 0.10  | 0.00  | 0.60  | 0.76  | 0.00  |
| <i>p_Chloroflexi</i>                                            | 2.20  | 0.06  | 0.40  | 0.10  | 0.00  |
| <i>c_Anaerolineae</i>                                           | 2.20  | 0.04  | 0.10  | 0.10  | 0.00  |
| <i>c_Thermomicrobia</i>                                         | 0.00  | 0.02  | 0.00  | 0.00  | 0.00  |
| <i>c_Ktedonobacteria_OTU_24</i>                                 | 0.00  | 0.00  | 0.30  | 0.00  | 0.00  |
| <i>p_Cyanobacteria/c_Chloroplast</i>                            | 5.10  | 4.62  | 6.60  | 1.70  | 0.36  |
| <i>p_Firmicutes</i>                                             | 0.00  | 0.04  | 0.00  | 0.00  | 0.12  |
| <i>c_Bacilli</i>                                                | 0.00  | 0.04  | 0.00  | 0.00  | 0.00  |
| <i>c_Clostridia</i>                                             | 0.00  | 0.00  | 0.00  | 0.00  | 0.12  |
| <i>p_Proteobacteria</i>                                         | 80.60 | 91.22 | 88.00 | 90.52 | 85.58 |
| <i>c_Alphaproteobacteria</i>                                    | 77.70 | 80.96 | 87.10 | 84.32 | 59.46 |
| <i>o_Rhizobiales</i>                                            | 68.60 | 68.58 | 86.80 | 81.92 | 59.08 |
| <i>f_Bradyrhizobiaceae</i>                                      | 37.50 | 6.54  | 1.60  | 5.08  | 58.64 |
| <i>f_Methylocystaceae</i>                                       | 0.10  | 0.54  | 0.00  | 0.10  | 0.12  |
| <i>f_Phyllobacteriaceae</i>                                     | 0.00  | 1.00  | 0.00  | 1.98  | 0.00  |
| <i>f_Rhizobiaceae</i>                                           | 0.10  | 0.52  | 72.50 | 0.02  | 0.12  |
| <i>f_Hyphomicrobiaceae/g_Blastochloris</i>                      | 30.90 | 59.98 | 12.70 | 74.74 | 0.20  |
| <i>o_Rhodobacterales/f_Rhodobacteraceae</i>                     | 7.70  | 5.24  | 0.20  | 0.22  | 0.00  |
| <i>g_Pannonibacter</i>                                          | 1.40  | 0.00  | 0.10  | 0.00  | 0.00  |
| <i>o_Rhodospirillales/f_Rhodopirillaceae/g_Telmatospirillum</i> | 0.00  | 0.00  | 0.00  | 0.00  | 0.06  |
| <i>o_Rickettsiales</i>                                          | 0.00  | 2.74  | 0.00  | 0.26  | 0.00  |
| <i>o_Sphingomonadales/f_Sphingomonadaceae/g_Sphingopyxis</i>    | 0.00  | 0.04  | 0.00  | 0.20  | 0.00  |
| <i>c_Betaproteobacteria</i>                                     | 0.60  | 0.08  | 0.10  | 0.00  | 0.04  |
| <i>o_Burkholderiales/f_Comamonadaceae/g_Comamonas</i>           | 0.00  | 0.06  | 0.00  | 0.00  | 0.00  |
| <i>o_Burkholderiales/f_Comamonadaceae/g_Acidovorax</i>          | 0.60  | 0.00  | 0.10  | 0.00  | 0.00  |
| <i>o_Rhodocyclales/f_Rhodocyclaceae</i>                         | 0.00  | 0.02  | 0.00  | 0.10  | 0.04  |
| <i>c_Gammaproteobacteria</i>                                    | 2.30  | 10.18 | 0.80  | 6.20  | 26.06 |
| <i>o_Chromatiales/f_Chromatiaceae</i>                           | 2.20  | 0.00  | 0.30  | 5.12  | 26.02 |
| <i>o_Xanthomonadales/f_Xanthomonadaceae</i>                     | 0.00  | 10.12 | 0.50  | 0.64  | 0.02  |
| <i>p_Verrucomicrobia/c_/o_/f_/g_Luteolibacter</i>               | 0.00  | 0.00  | 0.00  | 0.04  | 0.00  |
| <i>p_Tenericutes/c_/o_/f_/g_Acholeplasma</i>                    | 3.40  | 0.00  | 0.00  | 0.00  | 0.00  |
| Total                                                           | 97.20 | 98.16 | 95.80 | 93.32 | 95.22 |

**Table S2.** DNA sequencing results of the phototrophic mixed cultures operated with fermented wastewaters with molasses.

|                                                                           | R0   | R1   | R2   | R3  | R4  | R5   | R6  |
|---------------------------------------------------------------------------|------|------|------|-----|-----|------|-----|
|                                                                           | %    |      |      |     |     |      |     |
| <b><i>p_Acidobacteria/c_Chloracidobacteria</i></b>                        | 0.0  | 0.0  | 0.1  | 0.0 | 0.0 | 0.0  | 0.1 |
| <b><i>p_Actinobacteria</i></b>                                            | 19.7 | 0.2  | 56.5 | 0.3 | 1.3 | 12.1 | 2.6 |
| <i>o_Actinomycetales</i>                                                  | 0.5  | 0.0  | 55.2 | 0.1 | 0.0 | 0.2  | 0.2 |
| <i>f_Actinomycetaceae</i>                                                 | 0.5  | 0.0  | 55.2 | 0.1 | 0.0 | 0.2  | 0.1 |
| <i>g_Actinomyces</i>                                                      | 0.2  | 0.0  | 55.2 | 0.1 | 0.0 | 0.1  | 0.1 |
| <i>f_Corynebacteriaceae</i>                                               | 0.1  | 0.0  | 0.0  | 0.0 | 0.0 | 0.0  | 0.0 |
| <i>f_Nocardiaceae</i>                                                     | 0.2  | 0.0  | 0.0  | 0.0 | 0.0 | 0.0  | 0.0 |
| <i>o_Coriobacteriales</i>                                                 | 0.1  | 0.1  | 0.1  | 0.0 | 0.0 | 0.0  | 0.8 |
| <i>o_Corynebacteriales</i>                                                | 4.3  | 0.0  | 0.0  | 0.0 | 0.2 | 0.0  | 0.0 |
| <i>o_Mycobacteriales</i>                                                  | 0.2  | 0.0  | 0.0  | 0.0 | 0.0 | 0.0  | 0.0 |
| <i>o_Propionibacteriales</i>                                              | 0.6  | 0.1  | 0.9  | 0.2 | 0.3 | 11.5 | 0.8 |
| <i>f_Propionibacteriaceae / g_Propionimonas</i>                           | 0.0  | 0.0  | 0.8  | 0.2 | 0.1 | 11.1 | 0.4 |
| <i>o_Micrococcales</i>                                                    | 2.1  | 0.0  | 0.1  | 0.0 | 0.6 | 0.3  | 0.9 |
| <i>o_PeM15</i>                                                            | 10.9 | 0.0  | 0.0  | 0.0 | 0.1 | 0.1  | 0.0 |
| <b><i>p_Bacteroidetes</i></b>                                             | 0.6  | 0.2  | 1.5  | 0.1 | 1.1 | 1.0  | 0.9 |
| <i>c_Bacteroidia/o_Bacteroidales</i>                                      | 0.0  | 0.0  | 0.8  | 0.1 | 0.0 | 0.0  | 0.1 |
| <i>f_Prevotellaceae / g_Prevotella</i>                                    | 0.0  | 0.0  | 0.0  | 0.0 | 0.0 | 0.0  | 0.1 |
| <i>c_Flavobacteriia</i>                                                   | 0.4  | 0.1  | 0.5  | 0.0 | 0.4 | 0.0  | 0.5 |
| <i>c_Cytophagales</i>                                                     | 0.0  | 0.0  | 0.0  | 0.0 | 0.4 | 0.5  | 0.0 |
| <b><i>p_Chlorobi / c_Chlorobia / o_Chlorobiales / f_Chlorobiaceae</i></b> | 0.0  | 0.0  | 0.0  | 0.0 | 0.0 | 0.0  | 1.3 |
| <b><i>p_Chloroflexi</i></b>                                               | 13.7 | 0.3  | 1.1  | 0.0 | 1.0 | 0.6  | 0.1 |
| <i>c_Anaerolineae</i>                                                     | 0.3  | 0.2  | 0.1  | 0.0 | 0.1 | 0.2  | 0.0 |
| <i>c_Caldilineae / o_Caldilineales</i>                                    | 11.7 | 0.0  | 0.0  | 0.0 | 0.8 | 0.3  | 0.0 |
| <b><i>p_Cyanobacteria/c_Chloroplast</i></b>                               | 0.3  | 0.0  | 0.4  | 1.0 | 0.4 | 1.4  | 2.4 |
| <b><i>p_Firmicutes</i></b>                                                | 10.8 | 83.6 | 19.7 | 0.5 | 1.7 | 0.4  | 2.4 |
| <i>c_Bacilli</i>                                                          | 1.3  | 72.0 | 12.1 | 0.3 | 0.9 | 0.2  | 0.3 |
| <i>o_Lactobacillales</i>                                                  | 1.2  | 71.5 | 11.6 | 0.3 | 0.1 | 0.2  | 0.3 |
| <i>f_Carnobacteriaceae/g_Trichococcus</i>                                 | 0.6  | 68.8 | 3.5  | 0.0 | 0.0 | 0.0  | 0.0 |
| <i>f_Lactobacillaceae/g_Leuconostoc</i>                                   | 0.0  | 0.9  | 0.0  | 0.0 | 0.0 | 0.0  | 0.0 |
| <i>c_Clostridia</i>                                                       | 9.1  | 11.8 | 7.0  | 0.1 | 0.7 | 0.2  | 2.0 |
| <i>o_Clostridiales</i>                                                    | 9.1  | 11.8 | 7.0  | 0.1 | 0.7 | 0.2  | 2.0 |
| <i>f_Clostridiaceae / g_Clostridium</i>                                   | 2.0  | 0.3  | 1.2  | 0.0 | 0.3 | 0.1  | 0.0 |
| <i>f_Veillonellaceae</i>                                                  | 0.0  | 0.0  | 0.6  | 0.0 | 0.0 | 0.0  | 0.1 |
| <i>f_Peptostreptococcaceae</i>                                            | 6.7  | 10.0 | 2.0  | 0.0 | 0.3 | 0.1  | 0.0 |
| <i>f_Ruminococcaceae</i>                                                  | 0.0  | 0.0  | 0.4  | 0.0 | 0.0 | 0.0  | 0.3 |
| <i>c_Negativicutes / o_Selenomonadales / f_Acidaminococcaceae_OTU_21</i>  | 0.0  | 0.0  | 0.6  | 0.0 | 0.0 | 0.0  | 0.1 |

Table S2. Cont.

|                                              | R0   | R1   | R2   | R3   | R4   | R5   | R6   |
|----------------------------------------------|------|------|------|------|------|------|------|
|                                              | %    |      |      |      |      |      |      |
| <i>p_Proteobacteria</i>                      | 50.8 | 15.4 | 19.6 | 98.0 | 93.5 | 84.3 | 88.4 |
| <i>c_Alphaproteobacteria</i>                 | 42.3 | 10.1 | 12.8 | 97.6 | 79.5 | 20.8 | 81.9 |
| <i>o_Rhizobiales</i>                         | 21.1 | 2.9  | 9.7  | 95.9 | 7.6  | 6.5  | 73.7 |
| <i>f_Bradyrhizobiaceae</i>                   | 7.2  | 2.7  | 8.7  | 84.4 | 1.2  | 1.2  | 10.9 |
| <i>g_Rhodopseudomonas</i>                    | 5.7  | 2.7  | 8.7  | 83.9 | 0.7  | 0.7  | 10.5 |
| <i>f_Rhizobiaceae</i>                        | 0.6  | 0.0  | 0.0  | 11.2 | 1.0  | 1.9  | 32.9 |
| <i>g_Rhizobium</i>                           | 0.5  | 0.0  | 0.0  | 11.2 | 0.6  | 1.7  | 32.8 |
| <i>f_Hyphomicrobiaceae</i>                   | 3.0  | 0.1  | 0.8  | 0.1  | 1.8  | 0.5  | 22.5 |
| <i>g_Blastochloris</i>                       | 0.1  | 0.0  | 0.3  | 0.0  | 0.0  | 0.0  | 0.3  |
| <i>o_Rhodobacterales</i>                     | 18.4 | 6.8  | 1.6  | 1.3  | 70.6 | 10.0 | 6.3  |
| <i>f_Rhodobacteraceae</i>                    | 18.4 | 6.8  | 1.6  | 1.3  | 70.6 | 10.0 | 6.3  |
| <i>g_Rhodobacter</i>                         | 6.5  | 6.7  | 1.5  | 1.3  | 15.4 | 0.5  | 5.7  |
| <i>g_Paracoccus</i>                          | 0.5  | 0.0  | 0.1  | 0.0  | 53.7 | 9.5  | 0.7  |
| <i>g_Amaricoccus</i>                         | 0.0  | 0.0  | 0.0  | 0.0  | 0.1  | 0.0  | 0.0  |
| <i>o_Rhodospirillales</i>                    | 0.5  | 0.1  | 1.4  | 0.3  | 0.3  | 0.6  | 1.8  |
| <i>f_Rhodospirillaceae</i>                   | 0.1  | 0.0  | 0.1  | 0.2  | 0.1  | 0.2  | 0.1  |
| <i>o_Caulobacterales</i>                     | 0.8  | 0.4  | 0.0  | 0.0  | 1.0  | 3.7  | 0.0  |
| <i>c_Betaproteobacteria</i>                  | 5.3  | 0.1  | 0.2  | 0.4  | 5.0  | 63.0 | 1.9  |
| <i>o_Burkholderiales</i>                     | 3.7  | 0.0  | 0.1  | 0.3  | 0.5  | 0.2  | 1.8  |
| <i>f_Comamonadaceae</i>                      | 3.6  | 0.0  | 0.0  | 0.3  | 0.5  | 0.2  | 0.1  |
| <i>o_Rhodocyclales/f_Rhodocyclaceae</i>      | 1.6  | 0.0  | 0.1  | 0.1  | 4.4  | 62.9 | 0.1  |
| <i>g_OTU-10</i>                              | 0.0  | 0.0  | 0.0  | 0.0  | 4.3  | 58.1 | 0.0  |
| <i>c_Gammaproteobacteria</i>                 | 2.7  | 5.2  | 6.7  | 0.0  | 8.9  | 0.5  | 4.4  |
| <i>o_Chromatiales/f_Chromatiaceae</i>        | 0.4  | 5.0  | 2.1  | 0.0  | 2.9  | 0.1  | 3.9  |
| <i>o_Xanthomonadales</i>                     | 1.7  | 0.1  | 0.0  | 0.0  | 5.9  | 0.3  | 0.5  |
| <i>p_Saccharibacteria</i>                    | 2.0  | 0.0  | 0.4  | 0.0  | 0.0  | 0.0  | 0.8  |
| <i>p_Planctomycetes / c_Planctomycetacia</i> | 1.4  | 0.0  | 0.0  | 0.0  | 0.7  | 0.0  | 0.0  |
| <i>p_Synergistetes</i>                       | 0.1  | 0.0  | 0.0  | 0.0  | 0.0  | 0.0  | 0.0  |
| Total                                        | 99.4 | 99.7 | 99.3 | 99.9 | 99.7 | 99.8 | 99.0 |

**Table S3.** FISH results for GAOmix and PAOmixon probes for the PMC fed with acetate synthetic medium (S1 to S5) and PMC fed with a fermented wastewater (R1 to R6).

| <b>Samples</b> | <b>GAOmixon<br/>(GBG2 + GAOQ989)</b> | <b>PAOmixon<br/>(PAO462 + PAO651 + PAO846)</b> |
|----------------|--------------------------------------|------------------------------------------------|
| <b>S1</b>      | n.a                                  | n.a                                            |
| <b>S2</b>      | (-)                                  | (-)                                            |
| <b>S3</b>      | (-)                                  | n.a                                            |
| <b>S4</b>      | n.a                                  | n.a                                            |
| <b>S5</b>      | n.a                                  | n.a                                            |
| <b>R1</b>      | (-)                                  | (-)                                            |
| <b>R2</b>      | (-)                                  | (-)                                            |
| <b>R3</b>      | (-)                                  | (-)                                            |
| <b>R4</b>      | (-)                                  | (-)                                            |
| <b>R5</b>      | (-)                                  | (-)                                            |
| <b>R6</b>      | (-)                                  | (-)                                            |

Non-present (-); n.a. – not analyzed

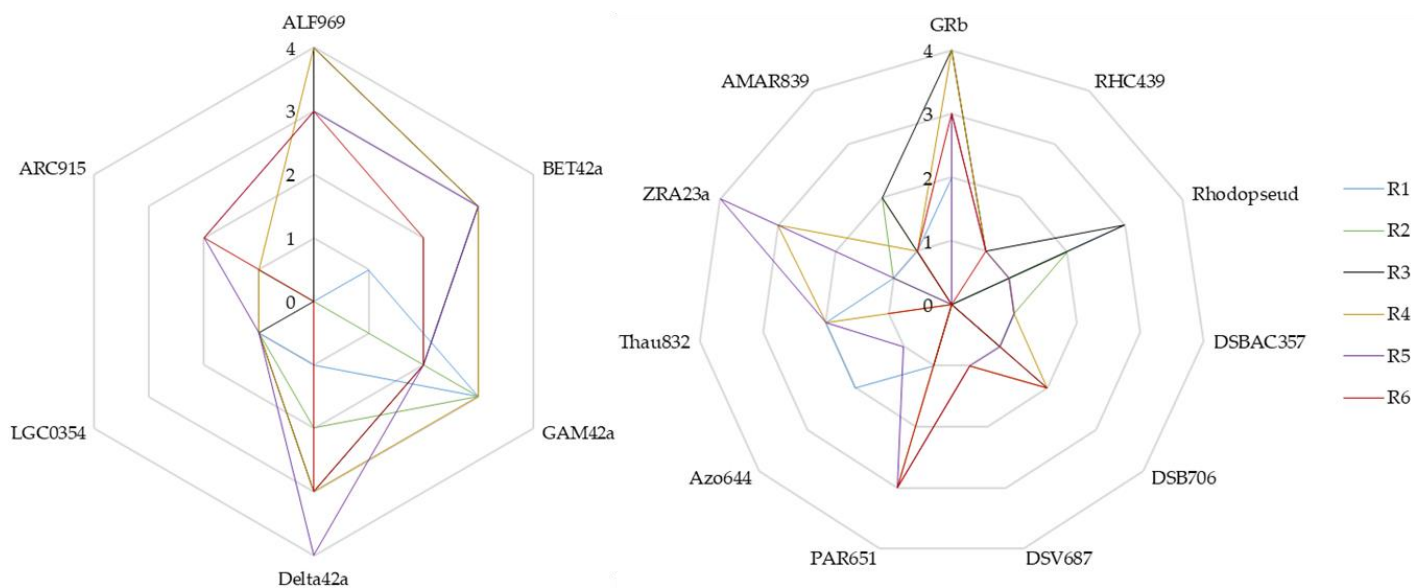

**Figure S1:** FISH results for the PMC fed with a fermented mixture of domestic wastewater supplemented with molasses (R1 to R6) presented in a radar chart. The relative abundances correspond to 4 - Extremely abundant (+++), 3 - Abundant (++), 2 - Present (+), 1 - Almost non-existent ( $\pm$ ) and 0 - Not detected, not analysed or inconclusive.

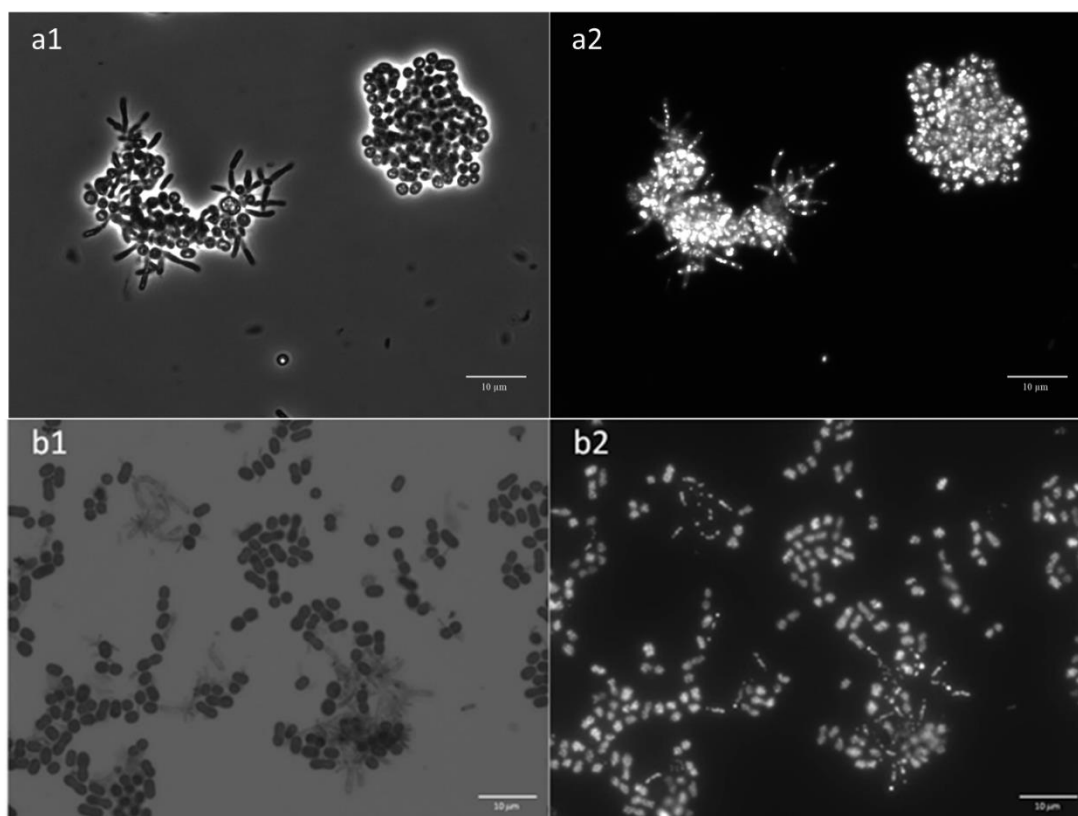

**Figure S2.** Microscopic images of the synthetically fed cultures S3 and S4 operated under a feast and famine (FF) regime. **a1** – Phase contrast of culture S4; **b1** – Bright field of culture S3; **a2 and b2** – Fluorescence images of Nile blue staining indicating PHA granules in culture S4 and S3, respectively. In the two cultures, both rods and cocci bacteria present PHA granules.

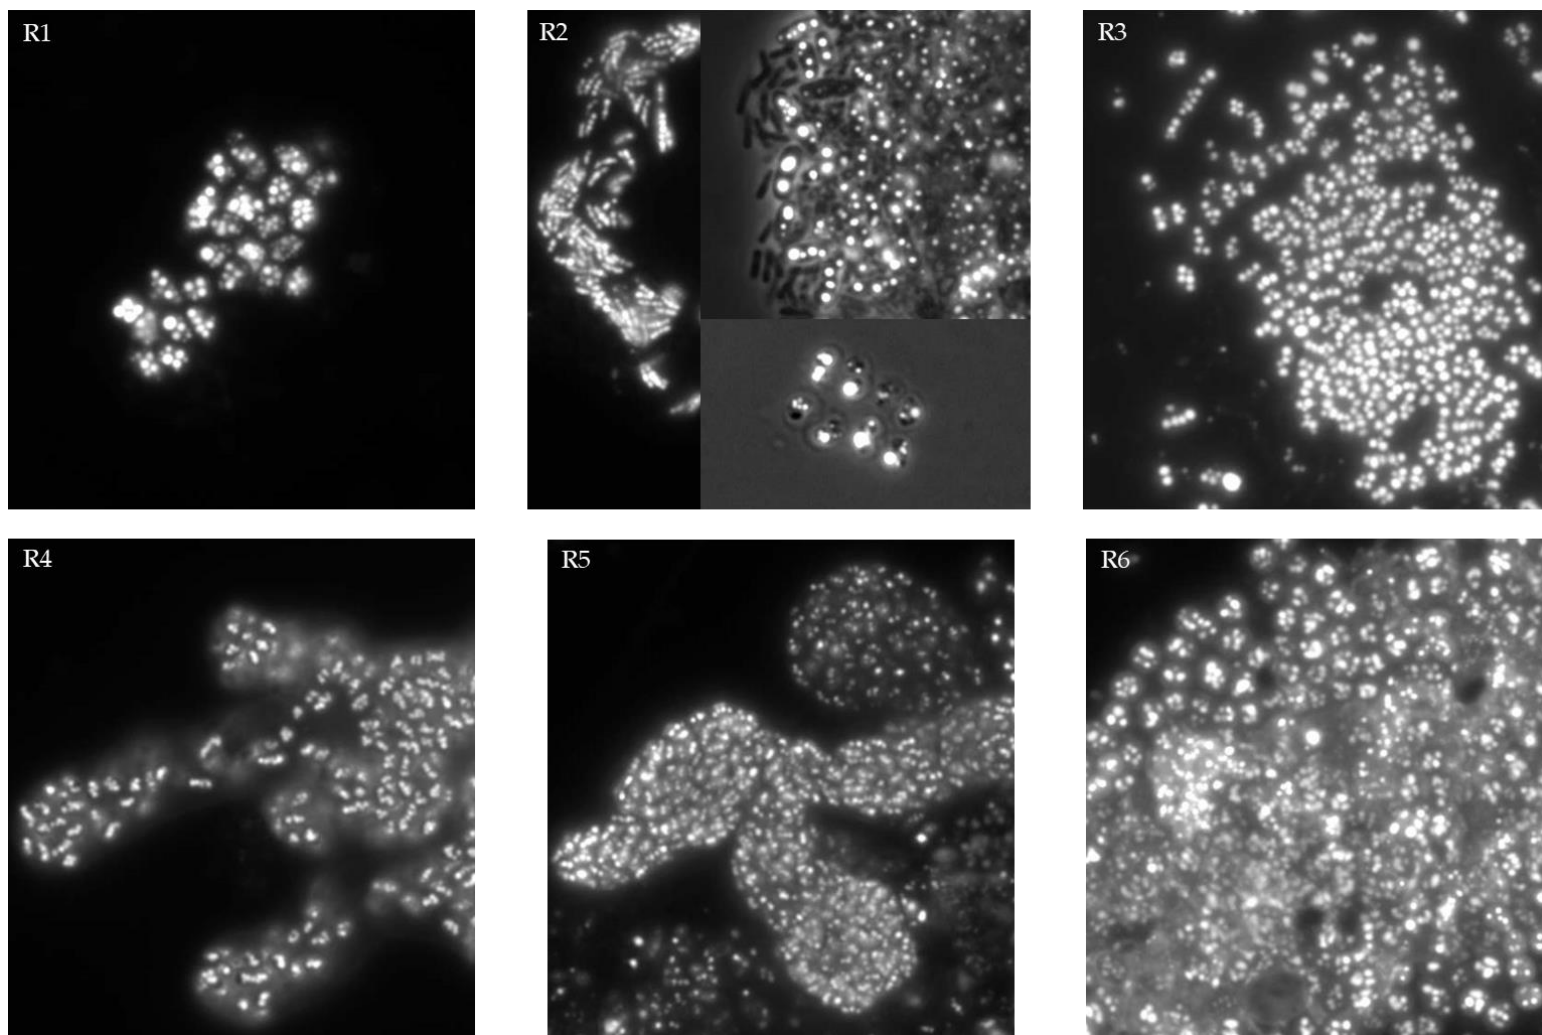

**Figure S3.** Fluorescence images of Nile blue staining indicating polyhydroxyalkanoates granules in R1 to R6 cultures. Magnification of 100x.

1

2

3

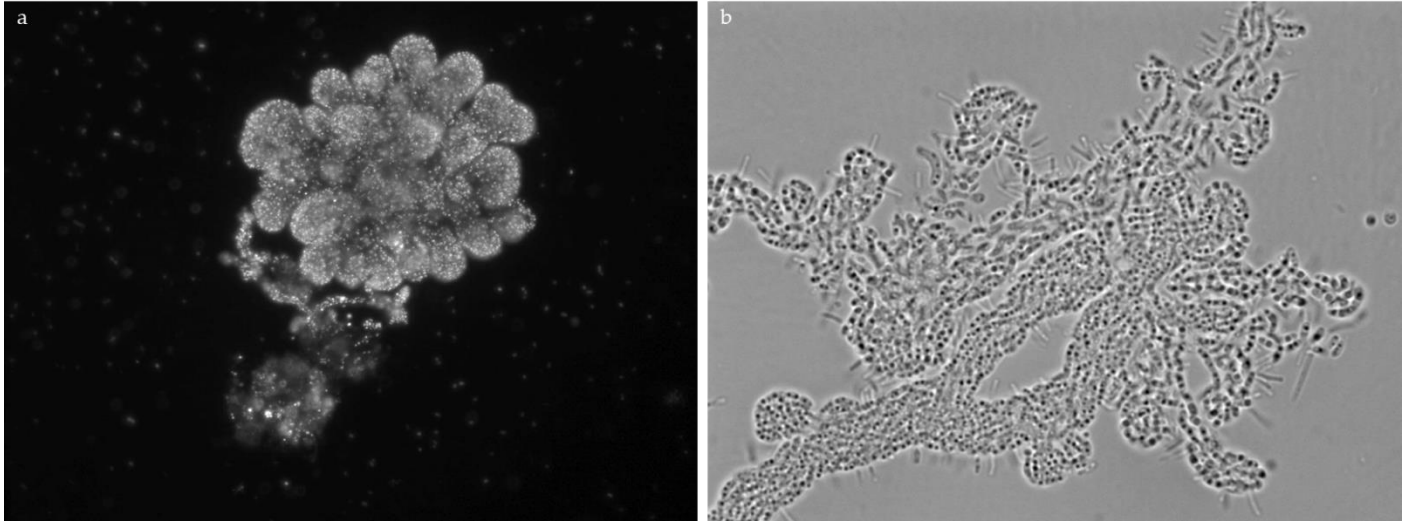

**Figure S4.** Microscopic pictures of swarm shaped aggregation observed in culture R5. **a** – Fruitig body development observation with Nile blue staining, magnification 100x; **b** – Bright field observation of swarm aggregated bacteria identified by FISH as Deltaproteobacteria, magnification 100x.
